# Supplementary material
Source: publisher figshare collection journal article supplement (https://acs.figshare.com/ndownloader/files/14005487)
Supplement: Supplementary file 1 [file 14005487]

## **SUPPORTING INFORMATION**

### **Vanadium Pentoxide Enwrapped Polydiphenylamine/Polyurethane nanocomposite: High Performance Anticorrosive Coating**

**Halima Khatoon<sup>1</sup>, Sharif Ahmad<sup>1\*</sup>**

**\*corresponding author**

**Halima Khatoon**

**Materials Research Laboratory**

**Department of chemistry**

**Jamia Millia Islamia (A Central University)**

**New Delhi-110025, India**

**E-mail address: hkn.nasir02@gmail.com**

**Orcid Id: 0000-0003-1819-7537**

**Sharif Ahmad\***

**Materials Research Laboratory**

**Department of Chemistry,**

**Jamia Millia Islamia (A Central University)**

**New Delhi-110025, India**

**Tel no. +91 11 26827508 Fax: +91 11 26840229**

**E-mail address: sharifahmad\_jmi@yahoo.co.in**

**Orcid Id: 0000-0001-5799-7348**

**\*Corresponding Author**

## Materials

Safflower oil (SFO) (iodine value: 140-150, refractive index: 1.476) was supplied by deve herbs, New Delhi, India. Sodium chloride (99%), Sodium bicarbonate (99%), Hydrogen peroxide (50 %), Glacial acetic acid (99%), conc. Sulphuric acid (99%), Diethyl ether, Diphenyl amine monomer, Ammonium peroxydisulphate, Toluene diisocyanate (TDI), dibutyltin dilaurete (DBTDL) and xylene were purchased from Merk Germany. Vanadium Pentaoxide was obtained from Thomas Baker Chemicals pvt. Limited, Mumbai, India.

## Material Characterizations

FTIR spectroscopic analysis was conducted with the help of IR-Affinity-1 Shimadzu spectrophotometer using ZnSe cell. The recording of FTIR spectra was based on 30 scans.  $^1\text{H}$  and  $^{13}\text{C}$  NMR were recorded on a 500 MHz Bruker (Avance 500, Germany), Ultrashield NMR instrument at room temperature using  $\text{CDCl}_3$  containing 0.03% (v/v) TMS (tetramethylsilane) as the internal standard. Thermal stability and degradation behavior were measured by EXSTAR TG/DTA 6000 under nitrogen atmosphere in the temperature range 0–800 °C at a heating rate of 10 °C min<sup>-1</sup>. The advance X-ray diffractometer (Rigaku Rodaflex 200B) was used to record the X-Ray diffraction (XRD) patterns at the  $2\theta$  in the range of 10° to 70° using Cu K $\alpha$  radiation.

Adhesion of the coatings with the CS surface was measured by cross hatch method in accordance with the ASTM D3359B-02. The cutting tool was fitted with a blade containing 11 teeth spaced 1.0 mm apart. The cutting tool was used to make the cross-cut pattern at ca. 90 ° angles through the surface of coatings. LA-26 tape was applied to the cut surface and rubbed with hands to ensure good contact with the film and then removed after 90 s. Impact resistance, scratch

hardness and bend test were determined by ASTM D2794-93, ASTM D1474-98 and ASTM-D522-93a respectively. The coating thickness was measured by Elcometer (ASTM B 499 Model 345 Elcometer instrument, Menchester, UK).

Water contact angle (CA) values were obtained using a Shape Analysis System (model DSA10MK2 Kruss GmbH, Germany) at ambient temperature with 5  $\mu$ L of deionized water (Millipore, >1.82 M $\Omega$ cm) on the surface of coatings. Percent water uptake of all the coated specimens was calculated, using the initial dry weight and the weight after immersion in water followed by drying under vacuum and blotted dry. The coated specimens were weighed after every 24h.

In order to evaluate the effect of oxidising acid on the surface of coatings, the CS, SFPU and V<sub>2</sub>O<sub>5</sub>-PDPA/SFPU coatings were immersed in an acidic medium (1 M H<sub>2</sub>SO<sub>4</sub>) for a period of 24h. A highly precise AFM (AFM, WITec, alpha 300 RA, Japan) technique was used to scan the corroded and uncorroded surfaces in a contact mode. The scan was performed on silicon cantilever with a radius of curvature  $\sim$ 8nm, spring constant 42N/m and a resonance frequency 76 KHz. WITec Project Data analysis software was used for data acquisition and image processing.

The salt spray test, ASTM B117-03, for coated substrates were carried out for a period of 10 days in a salt mist chamber under 5% NaCl solution at 90% humidity at 35 °C. The effects on the coated substrates were observed using SEM (Zeiss, EVO 18) under thin gold film at Electron Microscopy Centre.

The electrochemical corrosion measurement was conducted in 5 wt.% NaCl solution by the electrochemical workstation (PGSTAT302, Autolab) using EG&G flat glass cell (400 ml

capacity cell ) containing three electrode cell system i.e. Pt wire as a counter electrode and silver electrodes as a reference electrode, while the test specimens as working electrode. The test specimen, with 1.0 cm<sup>2</sup> surface area was exposed to 5% NaCl solution. Before the potentiodynamic polarization (PDP) and electrochemical impedance spectroscopy (EIS) measurements, the working electrode (in order to stabilize it) was allowed to stand for 30 min, then the open circuit potential (OCP), for 10 hrs, was measured as a function of time. After the stabilization of OCP, the impedance measurements were performed over a frequency range of 100 kHz-10m Hz, with a signal amplitude perturbation of 10 mV. The potentiodynamic polarization tests were carried out in the potential range  $\pm 100$  mV (with respect to OCP) at 0.01 mV/s scan rate. Nova 1.10 software was used for data fitting and calculation of results. All the data were run in triplicate for the reproducibility of data.

Surface characterization of the coated and uncoated CS samples after 30 days of exposure to 5wt% NaCl was examined using Lietz Optical Microscope (Model Metallux-3) at 100X. For this, the exposed area of the coated and uncoated CS samples was degreased in acetone and thoroughly washed with distilled water followed by air dry at room temperature.

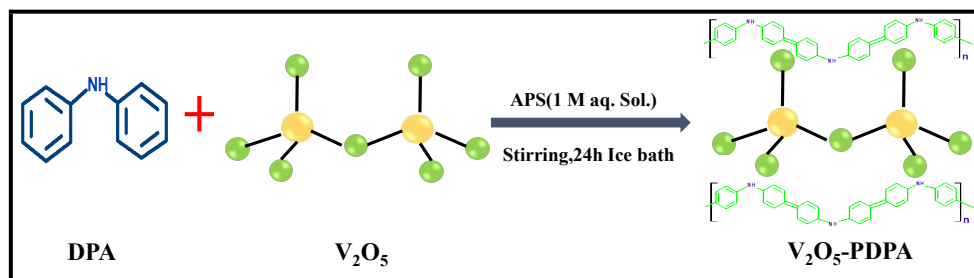

**Scheme S1a.** Schematic representation for the formation of V<sub>2</sub>O<sub>5</sub>-PDPA

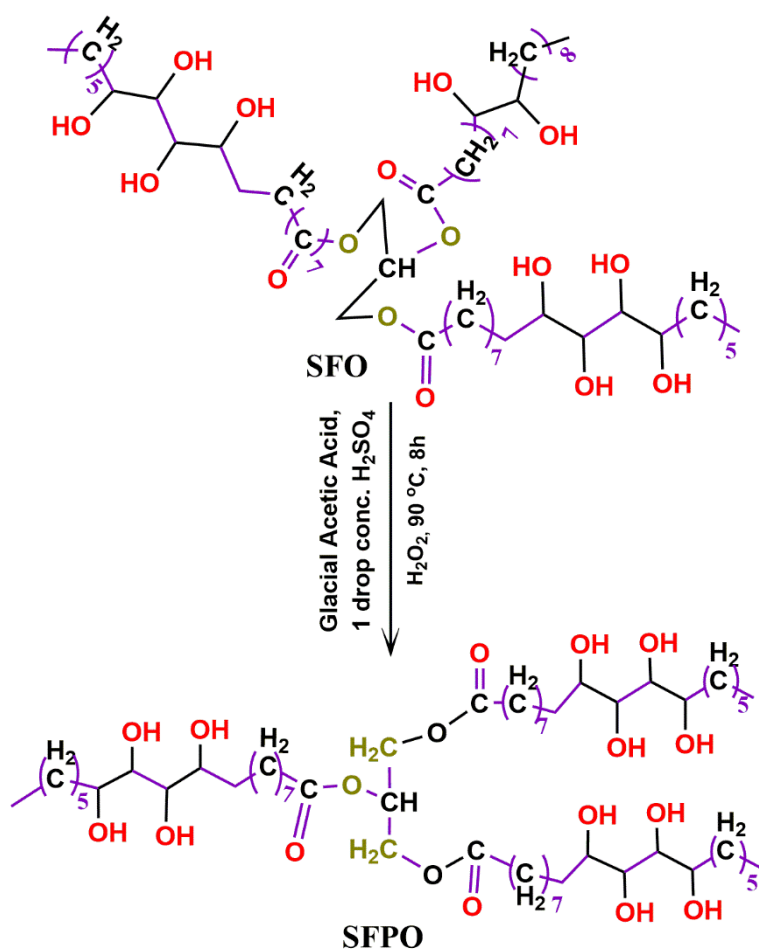

**Scheme S1b.** Schematic representation for the synthesis of SFPO

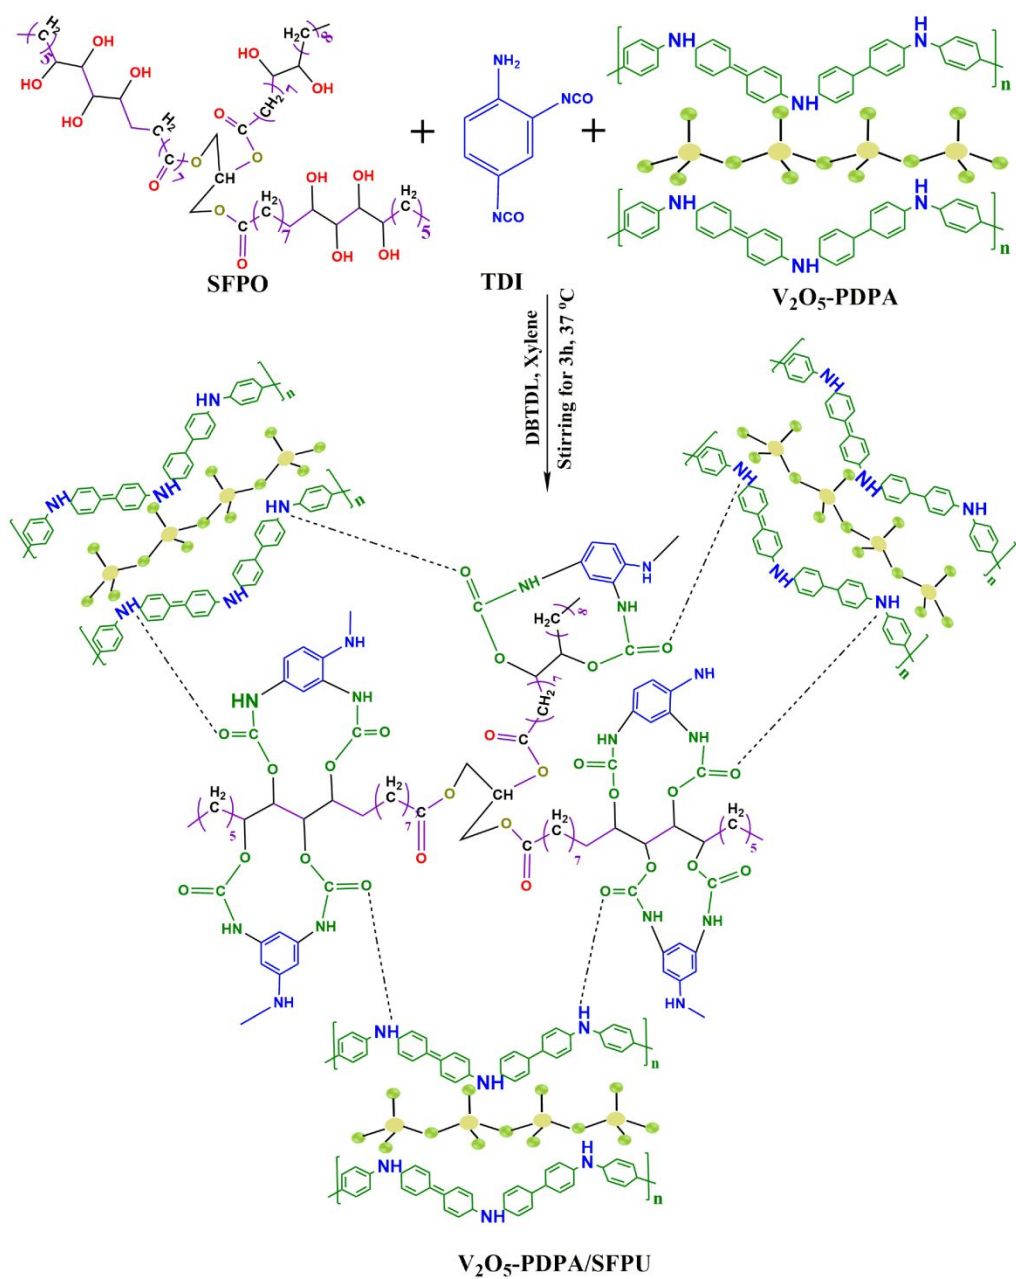

**Scheme S1c.** Schematic representation for the synthesis of V<sub>2</sub>O<sub>5</sub>-PDPA/SFPU

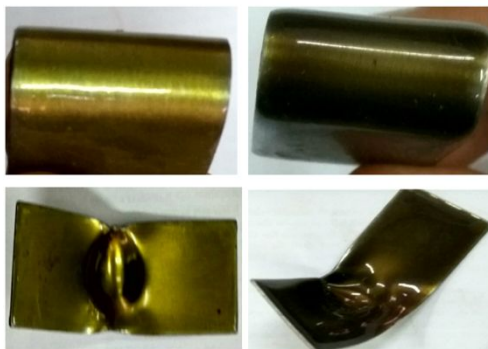

**Figure S1.** Digital images of SFPU and V<sub>2</sub>O<sub>5</sub>-PDPA/SFPU nanocomposite after (a) Bend and (b) Impact test

**Table S1 Physicochemical properties of SFPU and V<sub>2</sub>O<sub>5</sub>-PDPA/SFPU nanocomposite coatings**

| Resin Code                                          | Inherent Viscosity | Refractive Index | Specific Gravity |
|-----------------------------------------------------|--------------------|------------------|------------------|
| SFPU                                                | 0.956              | 1.453            | 1.38             |
| <b>0.5V<sub>2</sub>O<sub>5</sub>-<br/>PDPA/SFPU</b> | 1.009              | 1.485            | 1.42             |
| <b>1V<sub>2</sub>O<sub>5</sub>-<br/>PDPA/SFPU</b>   | 1.013              | 1.489            | 1.43             |
| <b>2V<sub>2</sub>O<sub>5</sub>-<br/>PDPA/SFPU</b>   | 1.112              | 1.493            | 1.46             |

**Table S2 Physicomechanical properties of SFPU and V<sub>2</sub>O<sub>5</sub>-PDPA/SFPU nanocomposite coatings**

| <b>Resin code</b>                                   | <b>Impact<br/>Resistance<br/>(lb/inch<sup>2</sup>)</b> | <b>Scratch<br/>Resistance (Kg)</b> | <b>Bend Test<br/>(1/8")</b> | <b>Thickness<br/>(μm)</b> |
|-----------------------------------------------------|--------------------------------------------------------|------------------------------------|-----------------------------|---------------------------|
| <b>SFPU</b>                                         | 250                                                    | 5.17                               | Pass                        | 89                        |
| <b>0.5V<sub>2</sub>O<sub>5</sub>-<br/>PDPA/SFPU</b> | 250                                                    | 6.17                               | Pass                        | 92                        |
| <b>1V<sub>2</sub>O<sub>5</sub>-<br/>PDPA/SFPU</b>   | 250                                                    | 7.36                               | Pass                        | 94                        |
| <b>2V<sub>2</sub>O<sub>5</sub>-<br/>PDPA/SFPU</b>   | 250                                                    | 8.19                               | Pass                        | 94                        |



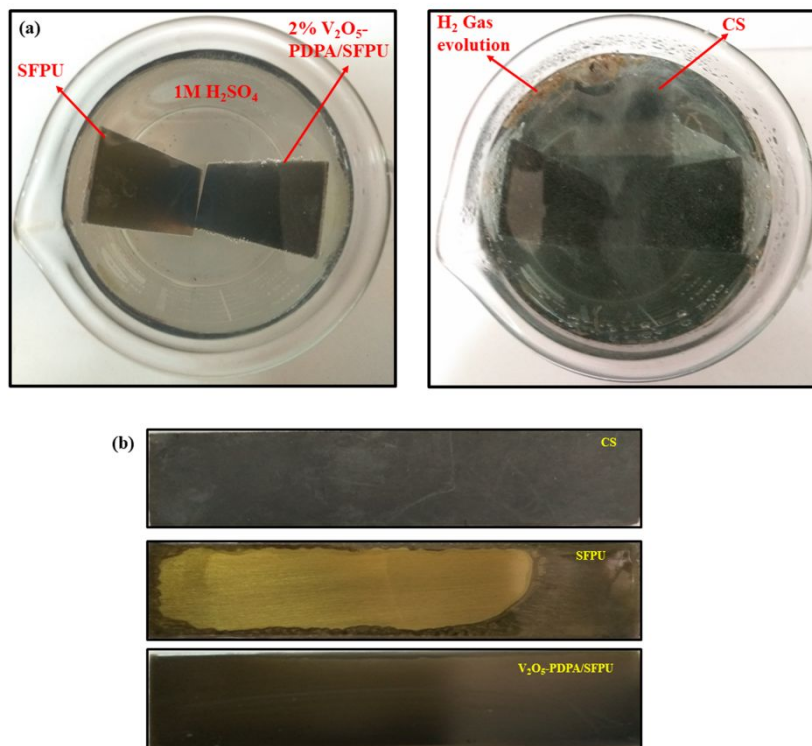

**Figure S2.** Digital images of the (a) CS, SFPU, V<sub>2</sub>O<sub>5</sub>-PDPA/SFPU at the time of immersion in 1M H<sub>2</sub>SO<sub>4</sub> (b) after the immersion test

### Description of equivalent circuit and method of EIS and their calculation

EIS, a non-destructive technique, was used to explore the electrochemical reaction mechanism occurring at the metal-electrolyte and metal-coating interface. It was used to collect the information about the resistance capacity of coatings, charge transfer resistance (corrosion reaction resistance) and electrical double layer capacity at the coating-metal interface.<sup>1</sup> EIS measurements were performed to analyze the electrochemical corrosion behaviour of CS, SFPU and nanocomposite coatings using an electrochemical equivalent circuit based on software NOVA 1.10, represented in Figure S3 a, b and c, respectively. Figure S3a includes solution resistance,  $R_s$  (3.23  $\Omega$ ), pore resistance,  $R_{pore}$ , (5631  $\Omega\text{cm}^2$ ) and electrical double-layer

capacitance,  $CPE_1$  ( $3.785 \times 10^{-5}$  F) occurred at the metal (CS)/solution (NaCl) interface. Additional elements such as  $R_{ct}$  (charge transfer resistance) and  $CPE2$  (constant phase element) for nanocomposite and Warburg resistance ( $Z_w$ ) for SFPU were obtained. To compensate for the deviation from ideal capacitive behaviour constant phase element ( $CPE2$ ) is used, and its related exponent ( $n$ ) symbolizes the degree of deviation from an ideal behaviour. For instance, ideal capacitance has  $n$  value equal to 1, whereas, ideal resistor it is absolute 0.<sup>2,3</sup>

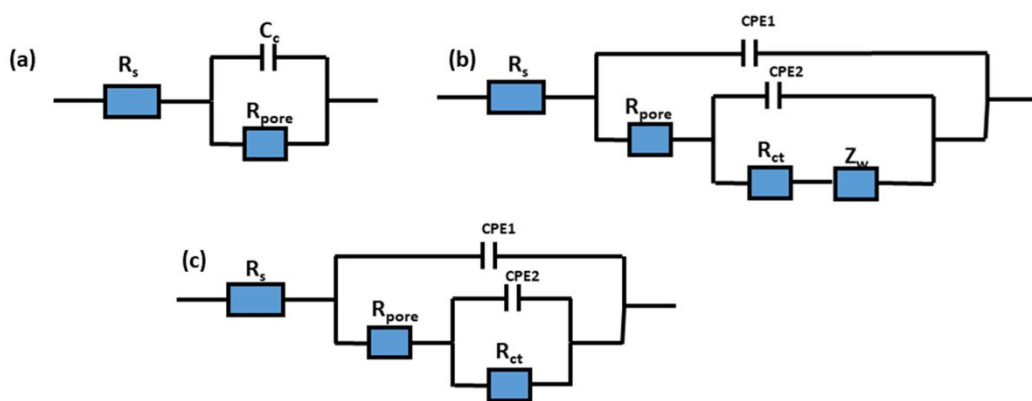

**Figure S3.** Electrochemical equivalent Circuit for (a) CS (b) SFPU and (c)  $V_2O_5$ -PDPA/SFPU

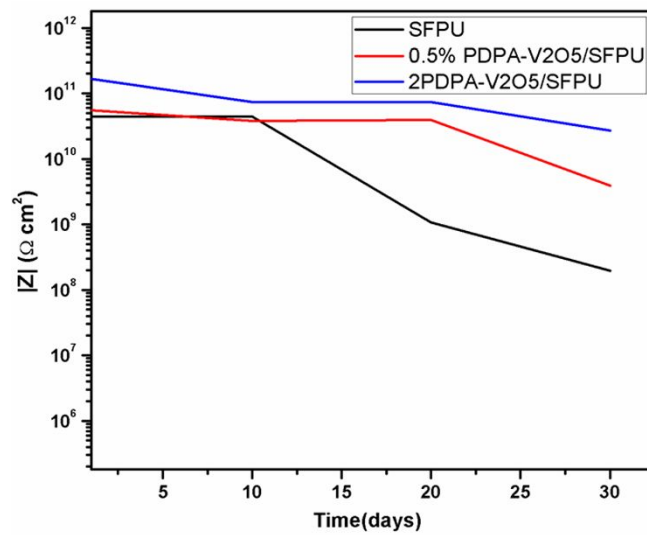

**Figure S4.** Impedance at low frequency ( $|Z|_{0.01\text{Hz}}$ ) for SFPU and  $\text{V}_2\text{O}_5$ -PDPA/SFPU nanocomposite coatings for 30 days of immersion

**Table S3.** Comparison for the corrosion resistance properties of SFPU and V<sub>2</sub>O<sub>5</sub>-PDPA/SFPU nanocomposite coatings with other such reported systems

| S. No. | Coating system                           | Medium/Immersion time | I <sub>corr</sub> (Acm <sup>-2</sup> ) | Polarization resistance (R <sub>p</sub> , Ω) | Corrosion rate (mpy)  | PE (%) | Ref          |
|--------|------------------------------------------|-----------------------|----------------------------------------|----------------------------------------------|-----------------------|--------|--------------|
| 1.     | SFPU                                     | 5 wt % NaCl /30 days  | 1.41x10 <sup>-9</sup>                  | 1.00x10 <sup>8</sup>                         | 1.64x10 <sup>-5</sup> | 99.991 | Present work |
| 2.     | PDPA-V <sub>2</sub> O <sub>5</sub> /SFPU | 5wt % NaCl /30 days   | 7.45x10 <sup>-11</sup>                 | 1.58x10 <sup>8</sup>                         | 8.66x10 <sup>-7</sup> | 99.999 | -do-         |
| 3.     | ETFE-<br>PANI/fCNTs-6                    | 3.5 wt % NaCl/90 days | 3.5×10 <sup>-10</sup>                  | -----                                        | 3.93x10 <sup>-5</sup> | 99.997 | 4            |
| 4.     | Epoxy/PSS-<br>PANI/rGO                   | 5 wt% NaCl/7 days     | 6.52×10 <sup>-8</sup>                  | 4.78                                         | 1.52×10 <sup>-3</sup> | -----  | 5            |
| 5.     | PANI@BN/PVA                              | 3.5 wt% NaCl/50 days  | 0.2×10 <sup>-6</sup>                   | 170×10 <sup>3</sup>                          | 0.007                 | 98.25  | 6            |
| 7.     | PANI/RGO/WPU                             | 3.5 wt% NaCl/---      | 3.69×10 <sup>-4</sup>                  | 3057.52                                      | 4.30×10 <sup>-6</sup> | 249.61 | 7            |

|            |                            |                       |                       |                     |                      |       |    |
|------------|----------------------------|-----------------------|-----------------------|---------------------|----------------------|-------|----|
| <b>8.</b>  | GP-TiO <sub>2</sub> /Epoxy | 3.5 wt% NaCl/----     | $105 \times 10^{-9}$  | -----               | $55 \times 10^{-3}$  | 99.94 | 8  |
| <b>9.</b>  | PANI/Zeolite               | 3.5 wt% NaCl/----     | $0.34 \times 10^{-6}$ | $31.28 \times 10^3$ | 0.004                | 99.2  | 9  |
| <b>10.</b> | PBMA-ZnO-PANI              | 3.5 wt% NaCl/----     | $30 \times 10^{-6}$   | -----               | 0.00076              | 83.03 | 10 |
| <b>11.</b> | PANI/Ce                    | 3.5 wt% NaCl          | $5.9 \times 10^{-9}$  | $5.57 \times 10^7$  | -----                | 99.9  | 11 |
| <b>12.</b> | 1.0POT/COPU                | 3.5 wt % HCl/ 20 days | $7.19 \times 10^{-8}$ | $4.6 \times 10^7$   | $3.7 \times 10^{-3}$ | 99.76 | 12 |
| <b>13.</b> | rGO/PVDF/PU                | 3.5wt% NaCl/1h        | $0.1 \times 10^{-6}$  | -----               | -----                | 99    | 13 |
| <b>14.</b> | ZnO-PANI-PVAc              | 3.5 wt. % NaCl/15 day | $7.37 \times 10^{-9}$ | -----               | -----                | ----- | 14 |

## References

- (1) Chen, F.; Liu, P. Conducting Polyaniline Nanoparticles and Their Dispersion for Waterborne Corrosion Protection Coatings. *ACS Appl. Mater. Interfaces* **2011**, 3, 2694-2702.
- (2) Cano, E., Lafuente, D. & Bastidas, D. M. Use of EIS for the Evaluation of the Protective Properties of Coatings for Metallic Cultural Heritage: A Review. *J. solid state Electrochem.* **2010**, 14, 381-391.
- (3) Jayanta, M.; Andreia, M.; Lauri, A.; Jekaterina, K.; Alda, S.; Vaino, S. Development of a Thin Ceramic-Graphene Nanolaminate Coating for Corrosion Protection of Stainless Steel. *Corros. Sci.* **2016**, 105, 161–169
- (4) Yuan, R.; Wu, S.; Yu, P.; Wang, B.; Mu, L.; Zhang, X.; Zhu, Y.; Wang, B.; Wang, H.; Zhu, J. Superamphiphobic and Electroactive Nanocomposite toward Self- Cleaning , Antiwear , and Anticorrosion Coatings. *ACS Appl. Mater. Interfaces*, **2016**, 8, 12481-12493.
- (5) Lin, Y.; Don, T.; Wong, C.; Meng, F.; Lin, Y.; Lee, S.; Lee, C.; Chiu, W. Surface & Coatings Technology Improvement of Mechanical Properties and Anticorrosion Performance of Epoxy Coatings by the Introduction of Polyaniline / Graphene Composite. *Surf. Coat. Technol.* **2018**, 10.1016/j.surfcoat.2018.01.050
- (6) Sarkar, N.; Sahoo, G.; Das, R.; Prusty, G.; Sahu, D.; Swain, S. K. Anticorrosion Performance of Three-Dimensional Hierarchical PANI @ BN Nanohybrids. *Ind. Eng. Chem. Res.* **2016**, 55, 2921–2931.
- (7) Cai, K.; Zuo, S.; Luo, Shipin.; Yao, C.; Liu, W.; Ma, J.; Mao, H.; Li, Z. Preparation of Polyaniline/Graphene Composites with Excellent Anti-Corrosion Properties and Their Application in Waterborne Polyurethane Anticorrosive Coatings. *RSC Adv.* **2016**, 6, 95965-95972.
- (8) Kumar, A.; Anant, R.; Kumar, K.; Chauhan, S. S.; Kumar, S.; Kumar, R. RSC Advances Response of a Graphene / TiO<sub>2</sub> – Epoxy. *RSC Adv.* **2016**, 6, 113405–113414.

- (9) Shabani, M.; Karimian, F. Electrosynthesis of a polyaniline/zeolite nanocomposite coating on copper in a three-step process and the effect of current density on its corrosion protection performance. *RSC Adv.*, **2015**, 5, 96601–96610
- (10) Sonawane, S. H.; Teo, B. M.; Brothie, A.; Grieser, F.; Ashokkumar, M. Sonochemical Synthesis of ZnO Encapsulated Functional Nanolatex and Its Anticorrosive Performance. *Ind. Eng. Chem. Res.* **2010**, 49, 2200–2205
- (11) Johansen, H. D.; Brett, C. M. A.; Motheo, A. J. Corrosion Protection of Aluminium Alloy by Cerium Conversion and Conducting Polymer Duplex Coatings. *Corros. Sci.* **2012**, 63, 342–350.
- (12) Kashif, M.; Ahmad, S. Polyorthotoluidine Dispersed Castor Oil Polyurethane Anticorrosive Nanocomposite Coatings. *RSC Adv.* **2014**, 4 (40), 20984.
- (13) Xiao, Y.; Ji, W.; Chang, K.; Hsu, K.; Yeh, J.; Liu, W. Sandwich-Structured RGO/PVDF/PU Multilayer Coatings. *RSC Adv.* **2017**, 7, 33829–33836.
- (14) Patil, R. C.; Radhakrishnan, S. Conducting polymer based hybrid nano-composites for enhanced corrosion protective coatings. *Prog. Org. Coat.* **2006**, 57, 332–336.
